# Supplementary material for: A Novel, Quick, and Reliable Smartphone-Based Method for Serum PSA Quantification: Original Design of a Portable Microfluidic Immunosensor-Based System
Source: MDPI journal article supplement (doi:10.3390/cancers14184483), 2022-09-16
Supplement: s1 [file s1]

A.

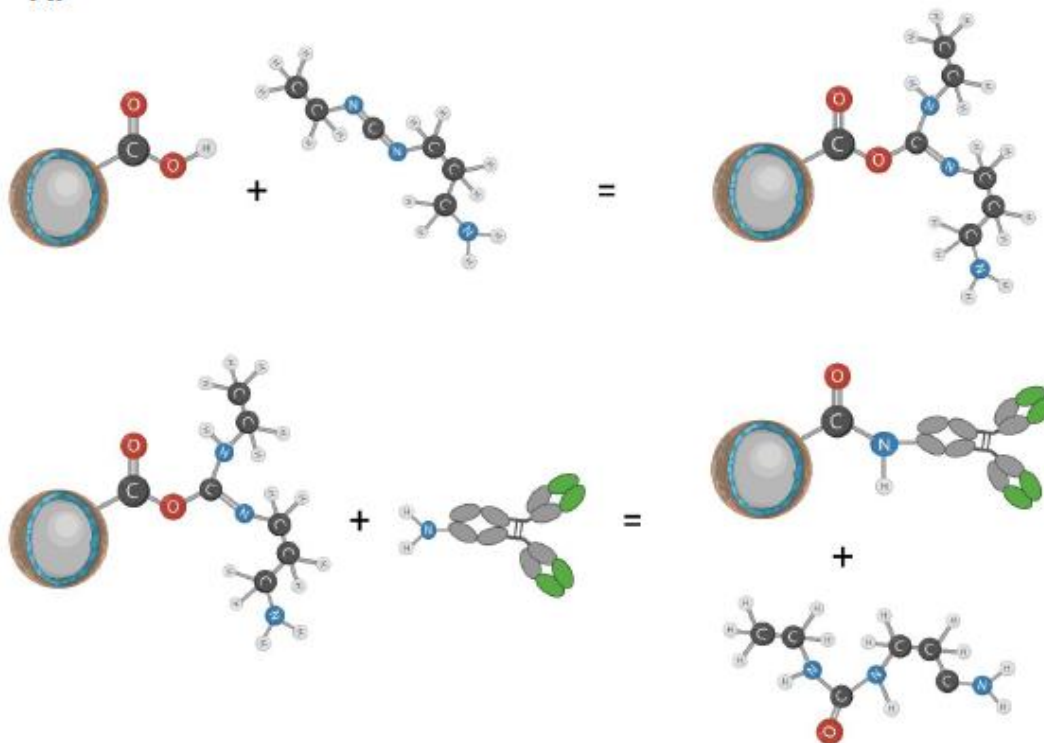

B.

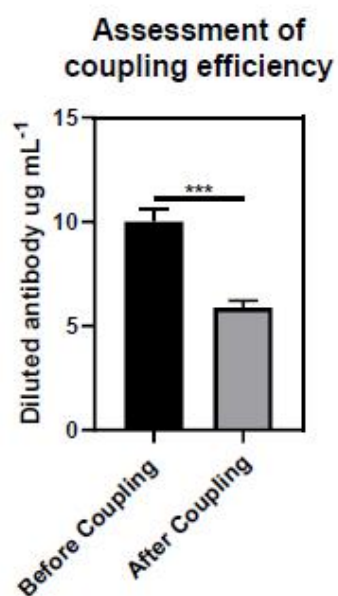

**Figure S1.** Schematic representation of the chemical reaction for coupling of the anti-PSA antibody to the magnetic microbeads and assessment of coupling efficiency. \*\*\*  $p < 0.001$ .

**Table S1.** Data of recruited patients

| Prostate Cancer Patients (n=50) |               |
|---------------------------------|---------------|
| Age, years. Media (range)       | 66,36 (46-77) |
| Nudes invasion                  | 24 (52,2 %)   |
| Seminal Invasion                | 10 (20%)      |
| Gleason                         |               |
| ≤ 6                             | 8 (162%)      |
| 7                               | 27 (54%)      |
| ≥ 8                             | 15 (30%)      |
| Pathological Stages             |               |
| pT2                             | 25 (          |
| pT3                             | 23 (46%)      |

**Table S2.** PSA levels obtained by the proposed platform

| Patient Code | Time  | PSA Gold Standard (ng mL <sup>-1</sup> ) | PSA Electrochemical (ng mL <sup>-1</sup> ) |
|--------------|-------|------------------------------------------|--------------------------------------------|
| PR14         | Basal | 16,33                                    | 17,2                                       |
| PR16         | Basal | 11,06                                    | 10,9                                       |
| PR17         | Basal | 5,46                                     | 5,23                                       |
| PR18         | Basal | 4,23                                     | 5,02                                       |
| PR019        | Basal | 5,88                                     | 6,2                                        |
| PR20         | Basal | 7,58                                     | 6,98                                       |
| PR16         | Basal | 11,06                                    | 10,34                                      |
| PR17         | Basal | 5,46                                     | 4,9                                        |
| PR18         | Basal | 4,23                                     | 4,24                                       |

|          |       |       |       |
|----------|-------|-------|-------|
| PR019    | Basal | 5,88  | 6,12  |
| PR20     | Basal | 7,58  | 6,97  |
| PR025    | Basal | 14,39 | 13,7  |
| PR027    | Basal | 10,12 | 9,45  |
| PR029    | Basal | 6,3   | 5,93  |
| PR030    | Basal | 8,9   | 8,87  |
| PR031    | Basal | 4,64  | 5,01  |
| PR033    | Basal | 11,49 | 12,16 |
| PR034    | Basal | 6,23  | 5,98  |
| PR036    | Basal | 13    | 12,6  |
| PR040    | Basal | 7,35  | 6,99  |
| PR042    | Basal | 11,05 | 10,2  |
| PR043    | Basal | 5,26  | 3,6   |
| PR-AL-01 | Basal | 11,4  | 10,9  |
| PR-AL-02 | Basal | 17,5  | 16,87 |
| PR-AL-03 | Basal | 9,34  | 8,2   |
| PR-AL-05 | Basal | 7,57  | 6,92  |
| PR-AL-06 | Basal | 4,22  | 4,67  |
| PR-AL-07 | Basal | 12,34 | 11,2  |
| PR-AL-10 | Basal | 24,89 | 21,8  |
| PR-AL-12 | Basal | 11,31 | 10,5  |
| PR-AL-13 | Basal | 12,19 | 11,9  |
| PR-AL-17 | Basal | 7,35  | 6,86  |
| PR_AL_19 | Basal | 10,91 | 10,23 |
| PR_AL_20 | Basal | 18,13 | 17,83 |

|          |         |       |       |
|----------|---------|-------|-------|
| PR_AL_21 | Basal   | 44,86 | 45,78 |
| PR_AL_23 | Basal   | 5,14  | 4,98  |
| PR-AL-24 | Basal   | 12,95 | 12,02 |
| PR-AL-25 | Basal   | 4,54  | 3,41  |
| PR-AL-26 | Basal   | 43,51 | 46,78 |
| PR-AL-27 | Basal   | 10,32 | 9,45  |
| PR-AL-28 | Basal   | 8,01  | 8,12  |
| PR-AL-29 | Basal   | 7,07  | 7,19  |
| PR-AL-30 | Basal   | 12,41 | 11,5  |
| PR-AL-31 | Basal   | 36,52 | 35,6  |
| PR-AL-32 | Basal   | 4,63  | 4,76  |
| PR-AL-33 | Basal   | 40,02 | 39,1  |
| PR-JA-03 | Basal   | 7,12  | 6,12  |
| PR-JA-04 | Basal   | 5,62  | 4,12  |
| PR-JA-05 | Basal   | 24,2  | 24,01 |
| CPRC11   | Basal   | 70,88 | 81,2  |
| PR14     | 6 weeks | 0,01  | 0,1   |
| PR16     | 6 weeks | 0,01  | 0,2   |
| PR17     | 6 weeks | 0,41  | 0,31  |
| PR18     | 6 weeks | 0     | 0     |
| PR019    | 6 weeks | 0,01  | 0     |
| PR20     | 6 weeks | 0,27  | 0,12  |
| PR16     | 6 weeks | 0,01  | 0     |
| PR17     | 6 weeks | 0,41  | 0,56  |
| PR18     | 6 weeks | 0     | 0     |

|       |          |      |      |
|-------|----------|------|------|
| PR019 | 6 weeks  | 0,01 | 0,03 |
| PR20  | 6 weeks  | 0,27 | 0,22 |
| PR025 | 6 weeks  | 0,01 | 0,2  |
| PR027 | 6 weeks  | 0,01 | 0,02 |
| PR029 | 6 weeks  | 0    | 0,23 |
| PR030 | 6 weeks  | 0,21 | 0,23 |
| PR031 | 6 weeks  | 0,1  | 0,32 |
| PR033 | 6 weeks  | 0,01 | 0,01 |
| PR034 | 6 weeks  | 0,01 | 0,02 |
| PR036 | 6 weeks  | 0,01 | 0,02 |
| PR040 | 6 weeks  | 0    | 0    |
| PR042 | 6 weeks  | 0,01 | 0,23 |
| PR043 | 6 weeks  | 0,01 | 0,02 |
| PR14  | 12 weeks | 0,01 | 0,02 |
| PR16  | 12 weeks | 0,03 | 0,06 |
| PR17  | 12 weeks | 0,01 | 0,01 |
| PR18  | 12 weeks | 0,01 | 0    |
| PR019 | 12 weeks | 0,01 | 0    |
| PR20  | 12 weeks | 0,15 | 0,14 |
| PR16  | 12 weeks | 0,03 | 0,04 |
| PR17  | 12 weeks | 0,01 | 0,03 |
| PR18  | 12 weeks | 0,01 | 0,05 |
| PR019 | 12 weeks | 0,01 | 0,06 |
| PR20  | 12 weeks | 0,15 | 0,5  |
| PR025 | 12 weeks | 0,01 | 0,05 |

|           |          |       |       |
|-----------|----------|-------|-------|
| PR027     | 12 weeks | 0,01  | 0,05  |
| PR029     | 12 weeks | 0,03  | 0     |
| PR030     | 12 weeks | 0,22  | 1,1   |
| PR031     | 12 weeks | 0,21  | 1,2   |
| PR033     | 12 weeks | 0,01  | 0,03  |
| PR034     | 12 weeks | 0,01  | 0,4   |
| PR036     | 12 weeks | 0,01  | 0,02  |
| PR040     | 12 weeks | 0,01  | 0,05  |
| PR042     | 12 weeks | 0,09  | 0,21  |
| PR043     | 12 weeks | 0,01  | 0,04  |
| CPRC11-6  | 6 weeks  | 14,98 | 14,02 |
| CPRC11-12 | 6 weeks  | 12,63 | 13,5  |
